# Supplementary material for: Exposure to ambient fine particulate matter and semen quality in Taiwan
Source: PubMed Central journal article supplement — Occup Environ Med. 2017 Nov 13;75(2):148–54. doi: 10.1136/oemed-2017-104529 (PMC5800343; doi:10.1136/oemed-2017-104529), 2017-11-13
Supplement: oemed-2017-104529supp001.pdf [file oemed-2017-104529supp001.pdf]

Supplementary Table 1 Characteristics of Male Participants Enrolled between 2001 to 2014

| Characteristics                                 | All Participants | Participants with Semen Assessment | <i>P</i> for comparison |
|-------------------------------------------------|------------------|------------------------------------|-------------------------|
| Number                                          | 158,542          | 6,938                              |                         |
| Age [year: mean (SD)] <sup>a</sup>              | 36.0(7.4)        | 32.0(4.3)                          | <0.05                   |
| Educational level (%)                           |                  |                                    | <0.05                   |
| High school or lower                            | 19.5%            | 12.1%                              |                         |
| College or university                           | 56.9%            | 59.8%                              |                         |
| Postgraduate                                    | 19.4%            | 25.5%                              |                         |
| Missing                                         | 4.2%             | 2.5%                               |                         |
| Cigarette smoking (%)                           |                  |                                    | <0.05                   |
| Never                                           | 55.6%            | 62.5%                              |                         |
| Former                                          | 8.3%             | 8.5%                               |                         |
| Current                                         | 31.7%            | 26.3%                              |                         |
| Missing                                         | 4.4%             | 2.7%                               |                         |
| Body mass index [kg/m <sup>2</sup> : mean (SD)] | 24.2(3.5)        | 23.9(3.3)                          | <0.05                   |
| Missing                                         | 0.15%            | 0.01%                              |                         |

<sup>a</sup> Age was available for all participants.

Supplementary Table 2 Associations between Exposure to PM<sub>2.5</sub> and Semen Quality in Participants with Normal Semen Parameters

| Semen Parameters (N=4951)                                         | Crude Model <sup>a</sup>     |        | Model 1 <sup>a</sup>         |        | Model 2 <sup>a</sup>         |        | Model 3 <sup>a</sup>         |        |
|-------------------------------------------------------------------|------------------------------|--------|------------------------------|--------|------------------------------|--------|------------------------------|--------|
|                                                                   | Coef/OR (95%CI) <sup>b</sup> | P      |
| <b>Short-term Exposure (3-month average PM<sub>2.5</sub>)</b>     |                              |        |                              |        |                              |        |                              |        |
| <b>Continuous</b>                                                 |                              |        |                              |        |                              |        |                              |        |
| Concentration (10 <sup>6</sup> /ml) <sup>c</sup>                  | 1.03 (1.02,1.04)             | <0.001 | 1.03 (1.02,1.04)             | <0.001 | 1.03 (1.02,1.04)             | <0.001 | 1.02 (1.01,1.04)             | <0.001 |
| Total motility (%)                                                | 0.16 (-0.01,0.34)            | 0.07   | 0.12 (-0.06,0.29)            | 0.19   | 0.11 (-0.06,0.29)            | 0.20   | 0.20 (0.01,0.38)             | 0.03   |
| Progressive motility (%)                                          | -0.13 (-0.33,0.08)           | 0.23   | -0.14 (-0.35,0.07)           | 0.18   | -0.12 (-0.33,0.08)           | 0.24   | -0.01 (-0.22,0.20)           | 0.93   |
| Normal morphology (%)                                             | -0.64 (-0.86,-0.43)          | <0.001 | -0.71 (-0.92,-0.49)          | <0.001 | -0.72 (-0.94,-0.50)          | <0.001 | -0.83 (-1.06,-0.61)          | <0.001 |
| <b>Dichotomous (&lt; 10<sup>th</sup> percentile as decreased)</b> |                              |        |                              |        |                              |        |                              |        |
| Decreased concentration                                           | 0.91 (0.86,0.97)             | 0.003  | 0.92 (0.87,0.98)             | 0.009  | 0.92 (0.87,0.98)             | 0.009  | 0.93 (0.87,0.98)             | 0.02   |
| Decreased total motility                                          | 0.87 (0.81,0.93)             | <0.001 | 0.88 (0.81,0.94)             | <0.001 | 0.88 (0.81,0.94)             | <0.001 | 0.87 (0.80,0.94)             | <0.001 |
| Decreased progressive motility                                    | 0.98 (0.92,1.03)             | 0.43   | 0.98 (0.93,1.04)             | 0.53   | 0.98 (0.92,1.04)             | 0.48   | 0.97 (0.91,1.03)             | 0.33   |
| Decreased normal morphology                                       | 1.24 (1.18,1.30)             | <0.001 | 1.25 (1.19,1.31)             | <0.001 | 1.25 (1.19,1.31)             | <0.001 | 1.29 (1.22,1.35)             | <0.001 |
| <b>Long-term Exposure (2-year average PM<sub>2.5</sub>)</b>       |                              |        |                              |        |                              |        |                              |        |
| <b>Continuous</b>                                                 |                              |        |                              |        |                              |        |                              |        |
| Concentration (10 <sup>6</sup> /ml) <sup>c</sup>                  | 1.02 (1.01,1.03)             | <0.001 | 1.02 (1.01,1.03)             | <0.001 | 1.02 (1.01,1.03)             | <0.001 | 1.02 (1.01,1.03)             | <0.001 |
| Total motility (%)                                                | 0.28 (0.08,0.49)             | 0.006  | 0.21 (0.01,0.42)             | 0.04   | 0.21 (0.01,0.42)             | 0.04   | 0.24 (0.04,0.44)             | 0.02   |
| Progressive motility (%)                                          | 0.01 (-0.23,0.24)            | 0.96   | -0.02 (-0.26,0.22)           | 0.88   | 0.00 (-0.24,0.23)            | 0.97   | 0.05 (-0.18,0.29)            | 0.67   |
| Normal morphology (%)                                             | -1.15 (-1.40,-0.90)          | <0.001 | -1.25 (-1.50,-1.00)          | <0.001 | -1.27 (-1.52,-1.02)          | <0.001 | -1.27 (-1.52,-1.02)          | <0.001 |
| <b>Dichotomous (&lt; 10<sup>th</sup> percentile as decreased)</b> |                              |        |                              |        |                              |        |                              |        |
| Decreased concentration                                           | 0.95 (0.88,1.01)             | 0.10   | 0.96 (0.90,1.02)             | 0.22   | 0.96 (0.90,1.02)             | 0.21   | 0.96 (0.89,1.02)             | 0.18   |
| Decreased total motility                                          | 0.81 (0.74,0.88)             | <0.001 | 0.83 (0.76,0.90)             | <0.001 | 0.83 (0.76,0.90)             | <0.001 | 0.83 (0.76,0.90)             | <0.001 |
| Decreased progressive motility                                    | 0.96 (0.90,1.03)             | 0.25   | 0.97 (0.90,1.03)             | 0.32   | 0.96 (0.90,1.03)             | 0.27   | 0.96 (0.90,1.03)             | 0.23   |
| Decreased normal morphology                                       | 1.40 (1.33,1.48)             | <0.001 | 1.42 (1.34,1.50)             | <0.001 | 1.42 (1.35,1.51)             | <0.001 | 1.43 (1.35,1.51)             | <0.001 |

Effect estimates were calculated for an increment of 5 µg/m<sup>3</sup> in PM<sub>2.5</sub> concentrations.

<sup>a</sup> Crude model had no adjustment; Model 1 was adjusted for age, educational level, smoking status, alcohol drinking, exercise, and occupational exposure to asbestos & organic solvent; Model 2 was further adjusted for Body Mass index, systolic blood pressure, fasting blood glucose and total cholesterol levels; Model 3 was further adjusted for season and year of medical examination.

<sup>b</sup> Beta coefficients (Coef) were presented for continuous variables and odd ratios (OR) were presented for dichotomous variables

<sup>c</sup> Concentration was log-transformed to achieve approximate normality for the data analysis and then the geometric coefficients were transformed back for presentation.

Abbreviations: particulate matter with an aerodynamic diameter less than 2.5  $\mu\text{m}$  (PM<sub>2.5</sub>).

Supplementary Table 3 Associations between Exposure to PM<sub>2.5</sub> and Semen Quality in Participants with Abnormal Semen Parameters

| Semen Parameters (N=1524)                                         | Crude Model <sup>a</sup>     |        | Model 1 <sup>a</sup>         |        | Model 2 <sup>a</sup>         |        | Model 3 <sup>a</sup>         |        |
|-------------------------------------------------------------------|------------------------------|--------|------------------------------|--------|------------------------------|--------|------------------------------|--------|
|                                                                   | Coef/OR (95%CI) <sup>b</sup> | P      |
| <b>Short-term Exposure (3-month average PM<sub>2.5</sub>)</b>     |                              |        |                              |        |                              |        |                              |        |
| <b>Continuous</b>                                                 |                              |        |                              |        |                              |        |                              |        |
| Concentration (10 <sup>6</sup> /ml) <sup>c</sup>                  | 1.05 (1.02,1.09)             | 0.004  | 1.05 (1.02,1.09)             | 0.003  | 1.06 (1.02,1.09)             | 0.002  | 1.05 (1.01,1.08)             | 0.009  |
| Total motility (%)                                                | 0.10 (-0.35,0.56)            | 0.66   | 0.03 (-0.42,0.48)            | 0.90   | 0.02 (-0.43,0.48)            | 0.92   | 0.08 (-0.39,0.55)            | 0.75   |
| Progressive motility (%)                                          | -0.37 (-0.74,0.00)           | 0.05   | -0.39 (-0.76,-0.01)          | 0.04   | -0.39 (-0.76,-0.02)          | 0.04   | -0.36 (-0.74,0.03)           | 0.07   |
| Normal morphology (%)                                             | -1.18 (-1.67,-0.69)          | <0.001 | -1.21 (-1.70,-0.72)          | <0.001 | -1.20 (-1.70,-0.71)          | <0.001 | -1.19 (-1.7,-0.68)           | <0.001 |
| <b>Dichotomous (&lt; 10<sup>th</sup> percentile as decreased)</b> |                              |        |                              |        |                              |        |                              |        |
| Decreased concentration                                           | 0.87 (0.78,0.97)             | 0.02   | 0.88 (0.78,0.98)             | 0.03   | 0.87 (0.78,0.98)             | 0.02   | 0.87 (0.77,0.98)             | 0.03   |
| Decreased total motility                                          | 1.01 (0.91,1.13)             | 0.79   | 1.02 (0.91,1.14)             | 0.67   | 1.02 (0.91,1.14)             | 0.66   | 1.02 (0.91,1.14)             | 0.68   |
| Decreased progressive motility                                    | 0.95 (0.84,1.05)             | 0.33   | 0.95 (0.84,1.06)             | 0.34   | 0.95 (0.84,1.06)             | 0.34   | 0.93 (0.82,1.05)             | 0.28   |
| Decreased normal morphology                                       | 1.30 (1.20,1.41)             | <0.001 | 1.31 (1.21,1.42)             | <0.001 | 1.31 (1.21,1.42)             | <0.001 | 1.32 (1.21,1.43)             | <0.001 |
| <b>Long-term Exposure (2-year average PM<sub>2.5</sub>)</b>       |                              |        |                              |        |                              |        |                              |        |
| <b>Continuous</b>                                                 |                              |        |                              |        |                              |        |                              |        |
| Concentration (10 <sup>6</sup> /ml) <sup>c</sup>                  | 1.04 (1.00,1.09)             | 0.04   | 1.05 (1.00,1.09)             | 0.03   | 1.05 (1.01,1.09)             | 0.02   | 1.05 (1.01,1.09)             | 0.02   |
| Total motility (%)                                                | 0.4(-0.15,0.95)              | 0.15   | 0.36 (-0.19,0.9)             | 0.20   | 0.36 (-0.18,0.91)            | 0.19   | 0.39 (-0.16,0.94)            | 0.17   |
| Progressive motility (%)                                          | -0.21(-0.66,0.23)            | 0.35   | -0.20 (-0.65,0.25)           | 0.38   | -0.20 (-0.65,0.25)           | 0.39   | -0.18 (-0.63,0.28)           | 0.45   |
| Normal morphology (%)                                             | -1.56(-2.14,-0.97)           | <0.001 | -1.58 (-2.18,-0.98)          | <0.001 | -1.56 (-2.16,-0.97)          | <0.001 | -1.52 (-2.11,-0.92)          | <0.001 |
| <b>Dichotomous (&lt; 10<sup>th</sup> percentile as decreased)</b> |                              |        |                              |        |                              |        |                              |        |
| Decreased concentration                                           | 0.81 (0.70,0.93)             | 0.004  | 0.82 (0.71,0.94)             | 0.005  | 0.81 (0.70,0.93)             | 0.004  | 0.81 (0.70,0.93)             | 0.004  |
| Decreased total motility                                          | 0.97 (0.84,1.11)             | 0.66   | 0.97 (0.84,1.11)             | 0.72   | 0.98 (0.84,1.12)             | 0.73   | 0.97 (0.84,1.12)             | 0.72   |
| Decreased progressive motility                                    | 0.89 (0.77,1.02)             | 0.12   | 0.89 (0.76,1.02)             | 0.10   | 0.89 (0.76,1.02)             | 0.10   | 0.89 (0.76,1.02)             | 0.10   |
| Decreased normal morphology                                       | 1.46 (1.32,1.62)             | <0.001 | 1.48 (1.33,1.64)             | <0.001 | 1.49 (1.34,1.65)             | <0.001 | 1.50 (1.35,1.67)             | <0.001 |

Effect estimates were calculated for an increment of 5 µg/m<sup>3</sup> in PM<sub>2.5</sub> concentrations.

<sup>a</sup> Crude model had no adjustment; Model 1 was adjusted for age, educational level, smoking status, alcohol drinking, exercise, and occupational exposure to asbestos & organic solvent; Model 2 was further adjusted for Body Mass index, systolic blood pressure, fasting blood glucose and total cholesterol levels; Model 3 was further adjusted for season and year of medical examination.

<sup>b</sup> Beta coefficients (Coef) were presented for continuous variables and odd ratios (OR) were presented for dichotomous variables

<sup>c</sup> Concentration was log-transformed to achieve approximate normality for the data analysis and then the geometric coefficients were transformed back for presentation.

Abbreviations: particulate matter with an aerodynamic diameter less than 2.5  $\mu\text{m}$  (PM<sub>2.5</sub>).
