# Supplementary material for: Exposure to ambient fine particulate matter and semen quality in Taiwan
Source: PubMed Central journal article supplement — Occup Environ Med. 2017 Nov 13;75(2):148–54. doi: 10.1136/oemed-2017-104529 (PMC5800343; doi:10.1136/oemed-2017-104529), 2017-11-13
Supplement: oemed-2017-104529supp002.pdf [file oemed-2017-104529supp002.pdf]

Supplementary Figure 1 Spatial correlation coefficients between the average satellite-retrieved and ground-based PM<sub>2.5</sub> from monitoring stations in Taiwan between 2005 and 2014. (A: monthly average; B: yearly average)

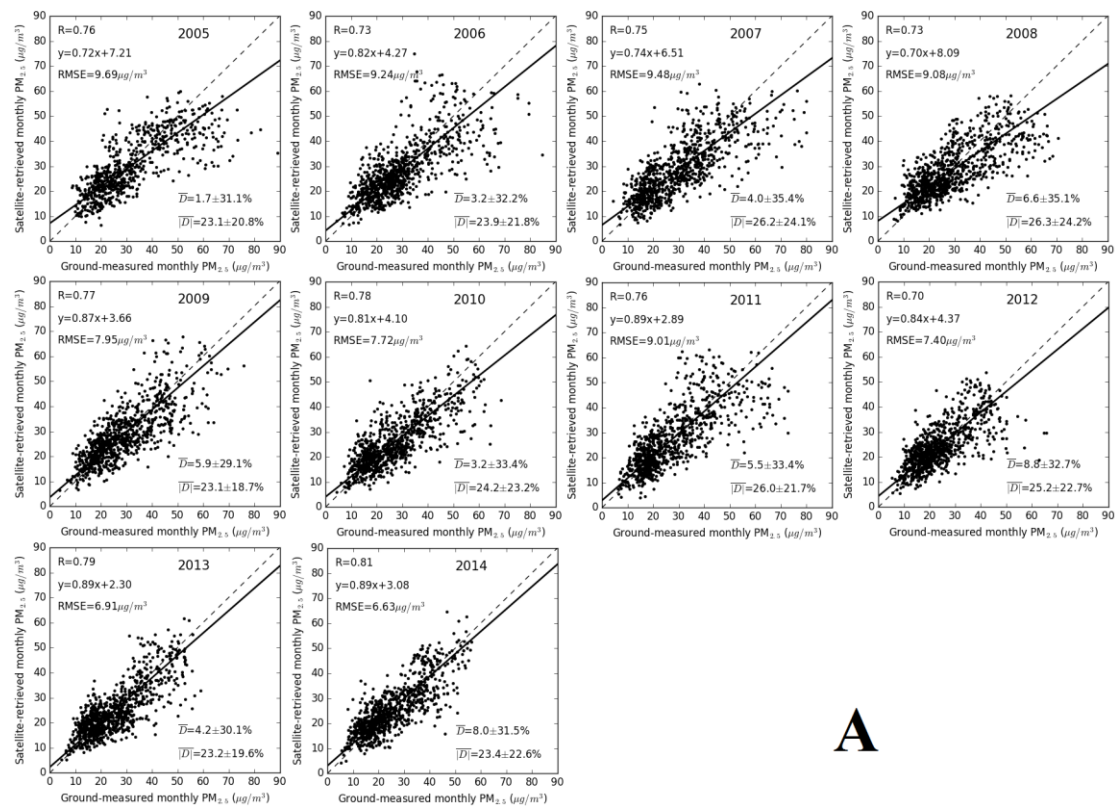

**A**

N: number of monitoring stations; R: correlation coefficient; RMSE: root mean square error;  $\bar{D}$ : mean deviation.

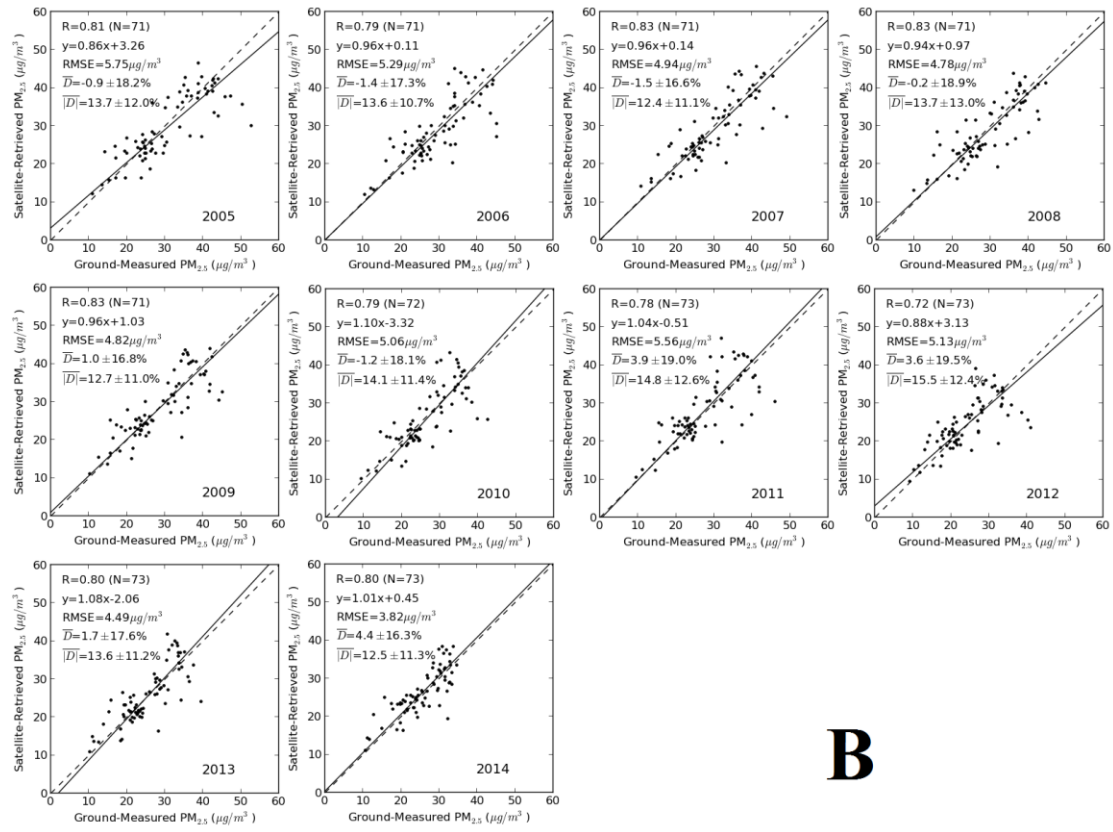

**B**

N: number of monitoring stations; R: correlation coefficient; RMSE: root mean square error;  $\bar{D}$ : mean deviation.
